1 ORIGINAL RESEARCH PAPER

2 **Micronutrient composition and microbial community analysis**  
3 **across diverse landraces of the Ethiopian orphan crop enset**

4 Solomon Tamrat<sup>a,b\*</sup>, James S. Borrell<sup>c\*\*†</sup>, Manosh K. Biswas<sup>d</sup>, Dawd Gashu<sup>e</sup>, Tigist Wondimu<sup>a</sup>, Carlos A.  
5 Vázquez-Londoño<sup>f</sup>, Pat J.S. Heslop-Harrison<sup>d</sup>, Sebsebe Demissew<sup>c,b,g</sup>, Paul Wilkin<sup>c</sup> and Melanie-Jayne  
6 R. Howes<sup>c</sup>.

7 \* Joint first authorship

8 † Corresponding author: [J.Borrell@kew.org](mailto:J.Borrell@kew.org)

9 <sup>a</sup>Department of Plant Biology and Biodiversity Management, Addis Ababa University, Addis Ababa, Ethiopia

10 <sup>b</sup>Department of Biology, Dilla University, SNNPR, Ethiopia

11 <sup>c</sup>Royal Botanic Gardens, Kew, Richmond, Surrey, TW9 3AE, UK

12 <sup>d</sup>Department of Genetics and Genome Biology, University of Leicester, LE1 7RH, UK

13 <sup>e</sup>Center for Food Science and Nutrition, Addis Ababa University, Addis Ababa, Ethiopia

14 <sup>f</sup>Faculty of Sciences, Universidad Nacional de Colombia, Bogotá, Zip Code 111321, Colombia

15 <sup>g</sup>Gullele Botanic Garden, P. O. Box 153/1029, Addis Ababa Ethiopia.

16

17

18

19

## 20 **Abstract**

21 Enset (*Ensete ventricosum*) is a major starch staple and food security crop for 20 million people.  
22 Despite substantial diversity in morphology, genetics, agronomy and utilization across its range,  
23 nutritional characteristics have only been reported in relatively few landraces. Here, we survey  
24 nutritional composition in 22 landraces from three enset growing regions. We present mineral  
25 characterization of enset corm tissue, free amino acid characterization of raw and processed  
26 (fermented) tissues and genomic analysis of the microbial community associated with fermentation.  
27 We show that compared to regionally important tubers and cereals, enset is high in calcium, iron,  
28 potassium and zinc and low in sodium. We report changes in free amino acid composition due to  
29 processing, and establish that the bacteria genera *Acetobacter*, *Lactobacillus* and *Bifidobacterium*,  
30 predominate during fermentation. Nutritional and microbial variation presents opportunities to select  
31 for improved composition, quality or safety with potentially significant impacts in food security and  
32 public health.

33

34

35

## 36 **Keywords**

37 *Ensete ventricosum*; Ethiopia; fermentation; free amino acids; food security; kocho; micronutrients;  
38 orphan crops.

39

## 40 **1. Introduction**

41 Humans currently satisfy most dietary requirements with surprisingly few species (Borrell et al.,  
42 2019), yet a much greater diversity of nutritionally suitable plants have been identified, often with  
43 narrow regions of utilization (Mayes et al., 2012). The food products of the large perennial herb  
44 *Ensete ventricosum* (Welw.) Cheesman (Musaceae) are an important dietary starch source in Ethiopia  
45 (Borrell et al., 2018; Fanta & Satheesh, 2019; Negash & Niehof, 2004). Commonly known as enset (or  
46 alternatively as the false banana or Abyssinian banana), this major food crop is principally cultivated  
47 as a highly resilient staple that withstands a wide range of environmental conditions and can buffer  
48 seasonal variation in food availability. Enset contributes to the food security of over 20 million people,  
49 but is virtually unknown outside of its narrow zone of cultivation in South West Ethiopia, despite  
50 growing undomesticated and unutilized across much of East and Southern Africa (Borrell et al., 2018).  
51 In addition to being processed for multiple food products, enset is also used for livestock fodder,  
52 packaging materials, fiber and traditional medicine (Borrell et al., *in press*; Mohammed, Martin, &  
53 Laila, 2013; Olango, Tesfaye, Catellani, & Pè, 2014).

54 Despite the importance of enset for food security and the existence of hundreds of diverse landraces  
55 (Borrell et al., 2018), the nutritional composition of the raw plant tissues and processed food products  
56 (e.g. *kocho*) has only been reported in a small number of landraces (Bosha et al., 2016; Daba &  
57 Shigeta, 2016; Mohammed et al., 2013; Nurfeta, Tolera, Eik, & Sundstøl, 2008). Reported nutritional  
58 composition and the relative concentrations of certain micronutrients show considerable variation.  
59 Whilst this may be attributable in part to differing analysis methods, the extensive diversity of  
60 genetically differentiated enset landraces (Borrell et al., 2018; Tobiaw & Bekele, 2011), heterogeneity  
61 of farm management practices (Garedew, Ayiza, Haile, & Kasaye, 2017; Olango et al., 2014) and

62 environmental conditions, particularly soil (Amede & Diro, 2005; Borrell et al., 2018), may also be a  
63 contributing factors. Therefore, we highlight the need to profile micronutrient composition across a  
64 representative subset of enset landrace diversity, whilst also characterizing the ubiquitous effects of  
65 fermentation on the composition, relevant to the quality and safety of enset foods, and the  
66 associated microorganism diversity responsible for mediating tissue processing.

67 The edible parts of enset comprise the starch rich pseudopetioles forming the pseudostem  
68 (overlapping leaf sheaths) which are decorticated, and the corm (the underground base of the stem  
69 that serves as a storage organ) which is pulverized and pressed (Borrell et al., 2018). These two main  
70 tissues are collectively processed, using fermentation pits, into starch staples including *bullā* and  
71 *kocho* (see Birmeta, Bakeeva, & Passoth, 2018, for a detailed description). *Kocho* is the bulk of the  
72 fermented product and is baked into a thin fibrous bread considered to have a good shelf life. *Bullā* is  
73 a small amount of water-insoluble starchy product separated from the *kocho* during processing by  
74 squeezing and sometimes consumed separately. The corm of enset is also occasionally consumed  
75 boiled, much like potato, and this is called *amicho*.

76 The precise fermentation practice is variable among regions and cultural groups (Garedew et al.,  
77 2017; Hunduma & Ashenafi, 2011). Karssa et al., (2014) reports preparation of a starter culture  
78 (known as *gamancho* or *gamma*) from selected corms of mature plants, followed by a two-phase  
79 process, with surface and then pit fermentation. Bosha et al. (2016) reports a ground mix of several  
80 other plant species being added to the mashed corm to initiate fermentation. Whereas many other  
81 authors (Birmeta et al., 2018; Gashe, 1987), indicate that fermentation is initiated simply from  
82 mashed tissue left for several days at ambient temperature.

83 The microorganisms responsible for fermentation alter the chemical composition of the raw  
84 substrate, which in some cases enriches the nutritional value of fermented products (Tamang,  
85 Watanabe, & Holzapfel, 2016) by removing anti-nutritionals and breaking down complex components.  
86 Furthermore, microbial communities introduced during processing are often critical to food safety  
87 and preservation by preventing growth of spoilage and toxic organisms. These microorganisms, often  
88 occurring as communities in food products are poorly known in orphan and minor tropical crops  
89 cultivated by subsistence farmers (Tamang et al., 2016). However, improvement of these cultures  
90 represents a relatively accessible opportunity to enhance the nutritional consistency, bioavailability  
91 and quality of neglected food products (Chelule, Mokoena, & Gqaleni, 2010), while urbanization and  
92 penetration of shops leads to loss of cultures traditionally maintained by smallholders.

93 In a study on *kocho* production from enset, Gashe (1987) reported that *Leuconostoc mesenteroides*  
94 and *Streptococcus faecalis* are responsible for initiating fermentation and reducing the pH. These are  
95 then superseded by the homofermentative bacteria *Lactobacillus coryniformis* subsp. *coryniformis*  
96 and *L. plantarum* which reduced the pH further. More recently, in an analysis of kocho samples from  
97 the Wolkite area, Weldemichael, Shimelis, Emire, & Alemu (2019) identified kocho-associated  
98 bacteria as predominantly from the genera *Lactobacillus* and *Acetobacteria*, whilst a survey of kocho  
99 samples from the Gamo highlands identified high relative abundance of *Enterobacteriaceae* and *L.*  
100 *mesenteroides* subsp. *cremoris* in the early stages of fermentation (Andeta, Vandeweyer,  
101 Woldesenbet, Eshetu, & Hailemichael, 2018). More generally, the process of fermenting enset has  
102 been reported to reduce total protein and carbohydrates, whilst increasing free amino acids (FAAs)  
103 1.6-fold (Urga et al. 1997). However, the specific free amino acids in fermented products have not  
104 been characterized. Therefore whether enset is a source of essential amino acids (those the body  
105 cannot synthesize in sufficient quantities) in this form is unknown.

106 We hypothesize that significant genomic, phenotypic, environmental and agronomic variation in  
107 enset should also result in variation in nutritional composition across landraces. In this study we  
108 investigate selected micronutrients with a focus on inorganic heavy metal and trace elements and  
109 free amino acids in domesticated enset in Ethiopia. We profile both raw tissues and processed  
110 (fermented) products in samples from 22 landraces across three major enset growing regions, and  
111 present a quantitative genomic survey of the microbial community associated with enset  
112 fermentation. We place our results in the context of other regionally available staples and the  
113 opportunities that nutritional and microbial variation presents for applied biotechnology to improve  
114 the nutritional quality, consistency and safety of enset derived foods.

## 115 **2. Material and Methods**

### 116 **2.1 Sample collection and preparation**

117 Fresh samples of six enset tissues (corm, pseudostem, leaf, fruit flesh, fruit peel (exocarp) and seed)  
118 were harvested from a selection mature enset plants (n=28, landraces=22) occurring in three regions;  
119 Sidama, Wolaita and Gurage zones in the Southern Nations Nationalities and Peoples Region (SNNPR),  
120 Ethiopia (Table 1). In selecting samples we sought to capture the full range of phenotypic and cultural  
121 variation. Selected plants were individually prepared, processed and fermented following traditional  
122 local practices and associated qualitative indigenous knowledge related to processing was recorded.  
123 Subsequently, samples of three enset products *kocho*, *bulla* and mixed *kocho* and *bulla* (Ko-Bu;  
124 whereby the *bulla* liquid is not isolated during preparation, a common practice in parts of Sidama)  
125 from selected plants were collected post-fermentation, air dried and powdered using an electric  
126 grinder.

### 127 **2.2 Micronutrient and mineral composition**

128 Micronutrient content used only raw corm tissue, as relative concentration of micronutrients should  
129 not be affected by fermentation. Total ash content was estimated using 5 g of desiccated corm tissue.  
130 Samples were charred in a hot plate (Wagtech Model ST15, Sweden) and ignited at 550°C for 5 hours  
131 a in a Muffle furnace (Carbolite Model S302RR, Sweden). Residual ash was calculated as a percentage  
132 of the original desiccated sample weight.

133 Mineral content was assessed using 0.5 g corm samples digested in a closed high-performance  
134 microwave digestion system (ETHOS) with the addition of trace metal grade 65% HNO<sub>3</sub> (Fisher  
135 Scientific, UK) and H<sub>2</sub>O<sub>2</sub> according to the manufacturer's recommendations under high pressure and  
136 temperature. The digest was washed with distilled water (Milli-Q). Multi-elemental analysis was  
137 conducted using an inductively coupled ICP-MS (Thermo-Fisher Scientific iCAP-Q; Thermo Fisher  
138 Scientific, Bremen, Germany). Samples were introduced from an auto-sampler (Cetac ASX-520)  
139 incorporating an ASXpress™ rapid uptake module through a perfluoroalkoxy (PFA) Microflow PFA-ST  
140 nebuliser (Thermo Fisher Scientific, Bremen, Germany). Internal standards were introduced to the  
141 sample stream on a separate line via the ASXpress unit and included Ge (10 µg L<sup>-1</sup>), Rh (10 µg L<sup>-1</sup>) and  
142 Ir (5 µg L<sup>-1</sup>) in 2% trace analysis grade (Fisher Scientific, UK) HNO<sub>3</sub>. External multi-element calibration  
143 standards (Claritas-PPT grade CLMS-2 from SPEX Certiprep Inc., Metuchen, NJ, USA) including Al, As,  
144 Cd, Ca, Co, Cr, Cs, Cu, Fe, K, Mg, Mn, Mo, Na, Ni, P, Pb, S, Se, and Zn, in the range 0 – 100 µg L<sup>-1</sup> (0, 20,  
145 40, 100 µg L<sup>-1</sup>) were used. A bespoke external multi-element calibration solution (PlasmaCAL, SCP  
146 Science, France) was used to create Ca, Mg, Na and K standards in the range 0-30 mg L<sup>-1</sup>. In addition,  
147 KH<sub>2</sub>PO<sub>4</sub> and K<sub>2</sub>SO<sub>4</sub> solutions were used to calibrate the machine during determination of P and S,  
148 respectively. Sample processing was undertaken using Qtegra™ software (Thermo-Fisher Scientific)  
149 utilizing external cross-calibration between pulse-counting and analogue detector modes when  
150 required. Blank digests containing all except enset samples were used for quality control. In addition,

151 a certified reference material (SRM 1567b – wheat flour) from the National Institute of Standards and  
152 Technology (NIST), USA was used for standardization. Comparative plant nutritional composition data  
153 was sourced from the USDA Food Composition Databases (USDA, 2012) and Feedipedia (Heuze,  
154 Thiollet H., Tran G., Hassoun P., & Lebas F., 2017), and plotted together with data from this study.

### 155 **2.3 Crude protein and free amino acid composition**

156 Crude protein was estimated using 0.5 g of desiccated corm tissue. Briefly, 6ml of conc H<sub>2</sub>SO<sub>4</sub> and  
157 3.5ml of H<sub>2</sub>O<sub>2</sub> were added followed by 3 g of a catalytic mixture of CuSO<sub>4</sub> and K<sub>2</sub>SO<sub>4</sub> (1:15) for 15  
158 minutes. The solution was heated at 370°C using a kjeldahl digester until a clear solution was  
159 observed and distilled using the Kjeldahl distillation apparatus (Auto K9840 Analyzer, Kjeltec, BCR-  
160 Technology Co, Ltd., China). The auto distiller was adjusted to add 30 ml distilled water (to avoid  
161 precipitation of sulfate in the solution), and 40 ml NaOH (35%) in order to neutralize excess acid,  
162 break down ammonium sulfate and release ammonia gas. The distillate was collected for 8 minutes in  
163 a 250 ml Erlenmeyer flask containing 2% boric acid and five drops of methyl red indicator. The  
164 distillate was titrated with standardized 0.1M HCl and sample N content determined by subtracting  
165 the N content of blank control samples.

166 Free amino acid composition was assessed in a subset of samples using an EZ:faast<sup>TM</sup> kit  
167 (Phenomenex, Macclesfield, UK). Powdered samples (100 mg) were extracted in 100% water and  
168 sonicated for 20 min prior to centrifugation. Supernatants were derivatized using the method  
169 described in the manufacturer's instructions, and as described previously (Dziągwa-becker, Weber,  
170 Zajączkowska, & Oleszek, 2018). Analyses of derivatized amino acids were performed with 2µl sample  
171 injections on a Thermo Scientific system, consisting of an 'Ultimate 3000' UHPLC unit and an 'LTQ  
172 Velos Pro' mass spectrometer (Thermo Scientific, Waltham, MA, USA). Chromatography (qualitative



173 and quantitative analyses) was performed as described in the EZ:faast™ kit's instructions, with amino  
174 acids assigned by comparison with the calibration amino acid standards provided with the kit. For  
175 each enset sample, all analyses were performed in triplicate, and the base peak areas for detected  
176 amino acid derivatives analyzed using Thermo Xcalibur (Thermo Fisher Scientific, USA) and R software  
177 (R Core Team, 2017), and averaged per sample.

## 178 **2.4 Genomic characterization of enset fermentation**

179 DNA was extracted from kocho using a standard CTAB protocol. High quality DNA was successfully  
180 isolated from the kocho of three landraces (Ganticho, Agade, and Ado), one sample failed (Hala).  
181 Library preparation followed the double digest restriction site associated sequencing protocol (tGBS)  
182 of Data2Bio (Iowa, USA). Sequencing was performed using the Ion Proton platform (Thermo Fisher  
183 Scientific, USA). Raw reads were subsequently trimmed and quality controlled following the Data2Bio  
184 pipeline.

185 To identify microorganisms present in kocho samples, retained sequences were mapped to 24,610  
186 reference bacteria and 285 reference fungi genomes, obtained from NCBI  
187 (<https://www.ncbi.nlm.nih.gov/>, accessed 20th March 2019). A local blast database was built and  
188 blast searches performed with e-value threshold of  $e^{-20}$  and scoring (match-mismatch) =1-2. The  
189 percentage of retained reads that aligned to a bacterial or fungal genome were recorded. As a  
190 control, DNA was also extracted from the leaf tissue of multiple farmer-grown enset accessions and a  
191 similar pipeline used to characterize bacteria or fungi present on the surface or within plant tissue.  
192 This approach provides a comparative line of evidence that where specific microbes identified in  
193 kocho samples are present at high concentrations, this is indicative that they are associated with  
194 fermentation (rather than simply present). It also provides an indication on whether the microbial

195 community responsible for fermentation originates from the plant surface/tissue or elsewhere, such  
196 as the wider environment (e.g. soil) or a starter culture.

### 197 **3. Results and discussion**

#### 198 **3.1 Sample collection, processing and associated knowledge**

199 Fermentation was initiated from mashed pseudostem tissue left for several days at ambient  
200 temperature without contrived additives of cultures or previous products. Kocho and Bulla were then  
201 fermented for three months, and Ko-Bu was fermented for six months. We recorded the ubiquitous  
202 use of fresh enset leaves as a work surface for processing and the prevailing views that fermentation  
203 will not be successful if the fermentation pit is not positioned within the enset growing area.  
204 Positioning of the enset fermentation pit within the enset growing area may indicate that  
205 temperature (or shade) is important, or alternatively may be related to the presence of specific  
206 microorganisms in the soil or elsewhere in the environment associated with enset plants. The  
207 resulting fermentation products can be stored for long periods (>6 months). As expected, farmers  
208 reported that different enset landraces produce *kocho* (or other products) of different qualities or  
209 preferred uses (including as medicines), however multiple landraces are normally processed together.  
210 In times of extreme famine, wild enset may be blended with harvested domestic plants, despite  
211 generally being considered unpalatable, though the resulting product is regarded as having lower  
212 quality, perhaps due to taste.

#### 213 **3.2 Inorganic composition of enset and comparison with other regional crops**

214 Mean ash content across 19 corm samples was 5.0% (sd=1.4%), which is similar to previously  
215 published ash content (4.5%) for enset corms (Nurfeta et al., 2008). Concentrations of inorganic

216 micronutrients and trace elements in raw enset corm tissue were averaged across 19 corm samples,  
217 each with two replicates, and plotted in Figure 1A. Inorganic micronutrient composition varied both  
218 by individual sample, and region (Figure 1B), although these data are unable to distinguish the relative  
219 importance of these two factors. Samples originating from Gurage zone were most variable on the  
220 first axis (27.1% of the variation), whilst samples from Sidama vary on the second axis (22.7% of the  
221 variation).

222 These data illustrate important variation in micronutrient composition across enset landraces and  
223 growing regions, which mirrors the high vernacular and genetic diversity reported elsewhere for this  
224 crop (Borrell et al., 2018; Yemataw, Mohamed, Diro, Addis, & Blomme, 2014). This indicates the  
225 influence of genetic, environmental and/or management factors, and as a result, there are likely to be  
226 appropriate genetic targets for breeding to enhance nutritional composition. Similar performance  
227 gains have been achieved in a range of other species for which there is high variability in  
228 micronutrient composition (Welch & Graham, 2004). These data also suggest that climate or soil  
229 conditions, together with enset management practices may influence the uptake and accumulation of  
230 micronutrients in enset corm tissue, in particular because micronutrient composition appears to  
231 cluster weakly by region (Figure 2) – though many landraces are region specific making further  
232 investigation of this pattern challenging. We note that consumption of some micronutrients in high  
233 amounts is not recommended (e.g. Ni, Cd) and high levels of these metals in samples from Sidama  
234 (Figure 1B, 1C) may be associated with groundwater contamination.

235 In a comparison with regionally important tuber and cereal crops, enset reports particularly high  
236 values for calcium, iron, potassium and zinc and relatively low values for sodium (Figure 2). Both iron  
237 and zinc deficiencies are widespread in the region (Grebmer et al., 2018). Anemia (iron deficiency) is

238 reported in 56% of children and 24% of adult women in Ethiopia (Gebru et al., 2018), with anemia also  
239 included in the World Health Organization's Global Nutrition Monitoring Framework for Ethiopia  
240 (WHO, 2019). This emphasizes the importance of enset as a potential dietary source of iron. Iron  
241 concentrations have previously been reported as higher in enset pseudostem compared to corm  
242 (Heuze et al., 2017) and we find further support for this pattern across a larger range of landraces  
243 (Figure 2), though we show almost 8-fold variation between samples. Zinc deficiency is also reported  
244 in diets in Ethiopia (Gebru et al., 2018; Kebede & Modes, 2013). In this study we provide further  
245 evidence that enset is an important source of Zinc, and that enset corm contains higher levels of zinc  
246 than pseudostem tissue. Overall, most micronutrients occur at higher concentrations in the  
247 pseudostem than the corm (Figure 2).

### 248 **3.3 Organic composition and the nutritional implications of enset fermentation**

249 Mean total protein content across 19 corm samples in this study was 4.6% (sd=1.5%), broadly  
250 consistent with values published elsewhere (Feedipedia: 3.5%, sd=1.1%). The mean concentration of  
251 FAAs across raw enset tissues and processed food products are reported in Figure 3A with overall  
252 concentrations for each FAA shown in Figure 3B. Of the edible components of enset, corm tissue  
253 contained the highest concentrations of FAAs, but was also most variable. FAA variation across  
254 samples is presented in Figure 3C with variable loadings for the first and second principal components  
255 reported in Figure 3D. Based on principal component analysis, concentrations for pseudostem were  
256 mostly clustered but showed higher variation for corm tissue. The most variable FAAs on the second  
257 axis associated with corm variability included arginine, histidine and aspartic acid. The relative  
258 concentrations of individual FAAs before and after fermentation is reported in Figure 4.

259 Processing of crops is normally performed to improve the digestibility of the product, removing anti-  
260 nutritional and allowing storage without microbial or animal (including insect) contamination.  
261 However, there is no evidence that unprocessed enset is toxic, contrasting with cassava (cyanide) or  
262 many legumes (with both highly toxic lectin glycoproteins and frequent association with fungi  
263 producing mycotoxins). In this instance, enset processing appears to have a significant impact on the  
264 composition of derived food products, with FAAs present at higher concentrations in raw tissues  
265 (particularly leaf and corm tissue; Figure 4A), suggesting that microorganisms are net consumers of  
266 FAAs during enset fermentation. These data also show that certain FAAs may be localized to specific  
267 tissues, for example arginine and glutamine are both detected in corm, but at low concentrations or  
268 absent in other tissues both pre- and post-fermentation (Figure 4). Similarly, phenylalanine and  
269 glycine occur at higher concentrations in fermented products than raw tissues, whilst many other  
270 FAAs decline. Overall, several essential amino acids (isoleucine, leucine, phenylalanine and valine) are  
271 increased in fermented products, particularly the main staple food, *Kocho*, suggesting that traditional  
272 fermentation practices may contribute to nutrition.

273 When protein or amino acids are ingested, the vast majority of digestion products that reach the  
274 blood stream are single amino acids, with the completeness of protein digestion dependent on  
275 metabolic factors (Bhutta & Sadiq, 2012). Thus in some cases ingested FAAs may be more bioavailable  
276 whilst in others a protein-rich diet may be poorly digested and of reduced nutritional value (Bhutta &  
277 Sadiq, 2012). Furthermore, certain amino acids contribute to the flavour of foods (Kato, Rhue, &  
278 Nishimura, 1989), thus influencing the selection of processing or fermentation methods and dietary  
279 choices of consumers, with potential consequences for human nutrition. We note wild enset is not  
280 consumed because it is considered bitter and unpalatable. It is interesting, therefore, that  
281 fermentation appears to markedly reduce aspartic acid and glutamic acid, both of which produce a

282 potent sour taste at relatively low concentrations, as well as reducing arginine and histidine  
283 concentrations, which are characteristic of bitter tastes. Whether development of processing  
284 techniques has been concomitant with domestication to produce food with improved palatability is  
285 an interesting area for further research.

286 This study also reveals detection of varying concentrations of the essential amino acids isoleucine,  
287 leucine, lysine, phenylalanine, threonine, tryptophan, and valine in different enset tissues (Figure 4),  
288 in the form of FAAs. Consequently, these data provide the first evidence that enset, as part of a  
289 broader diet, may contribute to intake of these essential amino acids. The principal FAA detected  
290 across all enset samples analysed in this study was arginine (Figure 4), which occurred at the highest  
291 levels in corm tissue. Although arginine is not an essential amino acid, some evidence suggests that  
292 increased dietary arginine can improve outcomes in critically ill individuals (Emery, 2012) and it is  
293 considered essential for infant growth, with histidine also being important for the latter (Brayfield,  
294 2019), and also detected in enset tissue, especially the corm (Figure 5).

295 A traditional use of enset in Ethiopia is its intake in the form of amicho (boiled corm), which is reputed  
296 to heal bone fractures (Borrell et al., 2018). Arginine is involved in collagen formation, tissue repair  
297 and wound healing via proline, which is hydroxylated to form hydroxyproline, and it may also  
298 stimulate collagen synthesis as a precursor of nitric oxide (Van de Poll, Luiking, Dejong, & Soeters,  
299 2012). The analysis of free amino acids in this study has revealed high levels of arginine, compared to  
300 other amino acids, detected in different edible parts of enset. This novel finding provides a rational  
301 scientific basis for the first time that may explain the reputed traditional use of enset to aid bone  
302 healing after breakage. Intriguingly, three landraces often reported as having medicinal properties  
303 (Koshkowashiye (Gurage), Astara (Sidama) and Lochingiya (Wolaita)) report three of the four highest

304 arginine values, whilst Lochingiya and Astara also report the highest calcium concentrations, a mineral  
305 critical for bone development if not healing.

### 306 **3.4 Microbial community characterization and signatures of contamination**

307 Sequencing of kocho samples resulted in 9.6M raw reads. After quality control 8.6M reads were  
308 retained with a length of 50-209bp. Of these, 1.9M and 24,300 reads returned BLAST hits above a  
309 threshold of  $e^{-20}$  for bacteria and fungi genomes, respectively. The bacterial species *Acetobacter*  
310 *pasteurianus* was the most frequent in the kocho samples Ganticho and Ado, whereas *Raoultella*  
311 *ornithinolytica* was found to be most frequent in Agade (Figure 5A). The fungal species *Penicillium*  
312 *chrysogenum*, *Pichia kudriavzevii* and *Aspergillus fischeri* were found most frequent in the Ganticho,  
313 Ado and Agade samples respectively (Figure 5B). A total of 797 bacterial species were found in  
314 common across the three kocho samples, though comparatively only eight fungi species were found  
315 across all samples (Figure 5C). As a control, BLAST results from leaf tissue is provided in Figure 5D and  
316 largely identifies distinct species from the main kocho analysis. The same analysis is presented at  
317 genus level in Figure S1.

318 Genomic analysis of the microbial community associated with enset fermentation showed that the  
319 most abundant genus of bacteria was *Acetobacter*, which is generally aerobic and known for  
320 producing acetic acid, reducing the pH of the fermenting enset pulp. It both gives a desirable flavor to  
321 the product and lowers the pH which inhibits growth of other organisms, thus allowing safe storage of  
322 the product. Whilst these species may occur as endophytes, the most common species identified in  
323 the kocho samples (*Acetobacter pasteurianus*) was not identified in raw leaf tissue (Figure 5D).  
324 The second most abundant genus was *Lactobacillus*, a group of anaerobic bacteria often associated  
325 with controlled fermentation in foods. In a comparison with the bacteria identified by Gashe (1987)

326 we also found *L. mensenteroides*, *L. coryniformis* and *L. plantarum* but not *S. faecalis*. In the genome  
327 sequencing of leaf-derived DNA, Harrison et al., (2014) reported extensive hits (>8%) against  
328 *Pseudomonas fluorescens* and *Methylobacterium radiotolerans*, which they propose are endophytes  
329 associated with enset; we also find a small number of *P. fluorescens* hits in our kocho samples, but  
330 only one hit to *M. radiotolerans*. Overall, our analysis identified many more bacterial than fungal  
331 sequences. We also find a much higher proportion of bacteria species in common between samples  
332 (39.2%), compared to fungi (1.6%) including the yeasts. This suggests that bacteria are principally  
333 responsible for enset fermentation.

334 These analyses provide an opportunity to identify potentially harmful microorganisms such as those  
335 associated with spoilage or food poisoning (Bhunja, 2018). The number of hits associated with  
336 *Escherichia*, *Campylobacter*, *Salmonella*, *Clostridium* (except in the *Ganticho* kocho sample) and  
337 *Listeria* was generally very low in all samples. However, whilst the microbial community composition  
338 of Ganticho and Ado were very similar, Agade was dominated by *Raoultella ornithinolytica*, a species  
339 associated with human infections. *Stenotrophomonas maltophilia*, *Acinetobacter johnsonii*, *Rahnella*  
340 *aquatilis* are other species potentially harmful to health were also among the most frequently  
341 identified bacteria in this sample. Similarly, the highest fungal hit for Agade was *Aspergillus*  
342 (*Neosartorya*) *fischeri*, a close relative of the major pathogen *Aspergillus fumigatus* also associated  
343 with hypersensitivity pneumonitis (farmer's lung, immunologically mediated inflammation). This  
344 suggests that in comparison to Ganticho and Ado, Agade could be characterized as a contaminated  
345 food product. The prevalence of enset food product contamination in Ethiopia is unknown.

#### 346 **4. Conclusions**



347 Ethiopia has historically been the world's largest recipient of targeted food aid (World Food  
348 Programme, 2013) and is 93<sup>rd</sup> of 119 qualifying countries in the 2018 Global Hunger Index (Grebmer  
349 et al., 2018). Nationally, undernourishment affects 21.4% of the population and 38.4% of children  
350 under the age of five are affected by stunting (Grebmer et al., 2018). Therefore effective utilization of  
351 agricultural diversity is a priority to achieve food security and address public health needs, particularly  
352 in the context of climate change and population growth (Pironon et al., 2019). However despite being  
353 a center of diversity for plant domestication, dietary diversity over much of Ethiopia is extremely low  
354 due to overdependence on starchy staples (Gebru et al., 2018) with major dietary deficiencies in iron  
355 and zinc. This is indicative of a However, whilst child stunting prevalence in the enset growing region  
356 (reflecting *chronic* undernutrition) is largely consistent with the national average (CSA and ICF, 2016),  
357 these areas have some of the lowest national levels of child wasting (an indicator of *acute*  
358 undernutrition). This provides compelling indirect evidence of the food security potential of enset in  
359 mitigating acute food insecurity events.

360 The results presented here show that there is significant potential for enhanced nutritional benefits  
361 (e.g. iron, zinc, FAAs) from enset that could impact the chronic health and welfare challenges  
362 experienced by millions of Ethiopian farmers whom rely on enset as a resilient starch staple. We show  
363 that there is significant variation in enset nutritional diversity, partitioned across multiple stages of  
364 enset cultivation and processing from the selection of landraces, environmental conditions and  
365 management practices, to the timing and selection of tissues for harvest and the microbial  
366 community associated with enset processing. Many of these sources of variation are not currently  
367 understood, controlled or investigated and represent significant opportunities for optimization or  
368 improvement. We also highlight that in addition to there being few enset germplasm collections  
369 (Borrell et al., 2018), there are no collections of the microbial communities associated with kocho

370 processing. We therefore suggest that it is important to further document, collect and preserve their  
371 diversity as they would be lost should farm structures, agronomy or management change for social or  
372 economic reasons. In summary, more than 20 million Ethiopians rely on enset-derived products as a  
373 starch staple or co-staple, and this population is projected to grow significantly in the coming decades  
374 (Borrell et al., 2018). Therefore, selection of enset landraces with improved raw nutritional content or  
375 enhanced processing techniques that improve the composition, quality or safety of enset based foods  
376 has the potential for significant public health impacts.

377

378

379

380

381

382

383

384

385

386

387

388

389 **Acknowledgements**

390 We thank farmers for processing enset tissues for study, and field assistants for data collection.

391 **Ethics Statement**

392 All indigenous knowledge associated with enset was collected with prior informed consent and in  
393 accordance relevant Access and Benefit Sharing Agreements.

394 **Funding Sources**

395 This work was supported by the GCRF Foundation Awards for Global Agricultural and Food Systems  
396 Research, entitled, 'Modelling and genomics resources to enhance exploitation of the sustainable and  
397 diverse Ethiopian starch crop enset and support livelihoods' [Grant No. BB/P02307X/1].

398 **Conflict of Interest Statement**

399 The authors declare no conflict of interests.

400

401

402

403

404

405

406

## 407 **References**

- 408 Amede, T., & Diro, M. (2005). *Optimizing soil fertility gradients in the Enset systems of the Ethiopian*  
409 *Highlands*.
- 410 Andeta, A. F., Vandeweyer, D., Woldesenbet, F., Eshetu, F., & Hailemichael, A. (2018). Fermentation of  
411 enset ( *Ensete ventricosum* ) in the Gamo highlands of Ethiopia: Physicochemical and microbial  
412 community dynamics. *Food Microbiology*, 73, 342–350.  
413 <https://doi.org/10.1016/j.fm.2018.02.011>
- 414 Bhunia, A. K. (2018). *Foodborne microbial pathogens: mechanisms and pathogenesis*. Springer.
- 415 Bhutta, Z. A., & Sadiq, K. (2012). *Protein Digestion and Bioavailability*. *Encyclopedia of Human*  
416 *Nutrition*. (A. Prentice, L. H. Allen, & B. Caballero, Eds.) (3rd ed.).
- 417 Birmeta, G., Bakeeva, A., & Passoth, V. (2018). Yeasts and bacteria associated with kocho, an  
418 Ethiopian fermented food produced from enset (*Ensete ventricosum*). *Antonie van*  
419 *Leeuwenhoek, International Journal of General and Molecular Microbiology*, 8.  
420 <https://doi.org/10.1007/s10482-018-1192-8>
- 421 Borrell, J. S., Biswas, M. K., Goodwin, M., Blomme, G., Schwarzacher, T., Heslop-Harrison, P. J. S., ...  
422 Wilkin, P. (2018). Enset in Ethiopia: a poorly characterised but resilient starch staple. *Annals of*  
423 *Botany*, xx–xxx, 1–20. <https://doi.org/10.1093/aob/mcy214>
- 424 Borrell, J. S., Dodsworth, S., Forest, F., Perez-Escobar, O. A., Lee, M. A., Mattana, E., ... Pironon, S.  
425 (2019). The climatic challenge: Which plants will people use in the next century? (ACCEPTED).  
426 *Environmental and Experimental Botany*.
- 427 Borrell, J. S., Goodwin, M., Blomme, G., Jacobsen, K., Wendawek, A. M., Gashu, D., ... Wilkin, P. (n.d.).  
20

- 428 Enset based agri-systems in Ethiopia: A systematic review of production trends, agronomy,  
429 processing and the wider food security applications of a neglected banana relative. *Plants,*  
430 *People, Planet.*
- 431 Bosha, A., Dalbato, A. L., Tana, T., Mohammed, W., Tesfaye, B., & Karlsson, L. M. (2016). Nutritional  
432 and chemical properties of fermented food of wild and cultivated genotypes of enset (*Ensete*  
433 *ventricosum*). *Food Research International*, *89*, 806–811.  
434 <https://doi.org/10.1016/j.foodres.2016.10.016>
- 435 Brayfield, A. (2019). Martindale: The Complete Drug Reference. Retrieved from  
436 <https://www.medicinescomplete.com>
- 437 Chelule, P. K., Mokoena, M. P., & Gqaleni, N. (2010). Advantages of traditional lactic acid bacteria  
438 fermentation of food in Africa, 1160–1167.
- 439 CSA (Central Statistical Agency) [Ethiopia] and ICF. (2016). *Ethiopia Demographic and Health Survey.*  
440 Addis Ababa, Ethiopia, and Rockville, MD, USA.
- 441 Daba, T., & Shigeta, M. (2016). Enset (*Ensete Ventricosum*) Production in Ethiopia: Its Nutritional and  
442 Socio-Cultural Values. *Agriculture and Food Sciences Research*, *3*(2), 66–74.  
443 <https://doi.org/10.20448/journal.512/2016.3.2/512.2.66.74>
- 444 Dziągwa-becker, M., Weber, R., Zajączkowska, O., & Oleszek, W. (2018). Free amino acids in *Viola*  
445 *tricolor* in relation to different habitat conditions. *Open Chemistry*, *16*(2), 833–841.
- 446 Emery, P. W. (2012). Amino Acids: Chemistry and Classification. In *Encyclopedia of Human Nutrition*  
447 (3RD ed., pp. 64–71). Academic Press.
- 448 Fanta, S. W., & Satheesh, N. (2019). Nutrition & Food Science A review on nutritional profile of the

- 449 food from enset: A staple diet for more than 25 per cent population in Ethiopia Article  
450 information: For Authors Article information: (March). [https://doi.org/10.1108/NFS-11-](https://doi.org/10.1108/NFS-11-2018-0306)  
451 2018-0306
- 452 Garedew, B., Ayiza, A., Haile, B., & Kasaye, H. (2017). Indigenous Knowledge of Enset ( *Ensete*  
453 *ventricosum* ( Welw .) Cheesman ) Cultivation and Management Practice by Shekicho People ,  
454 Southwest Ethiopia. *Journal of Plant Sciences*, 5(1), 6–18.  
455 <https://doi.org/10.11648/j.jps.20170501.12>
- 456 Gashe, B. A. (1987). Kocho fermentation. *Journal of Applied Bacteriology*, 62(6), 473–477.  
457 <https://doi.org/10.1111/j.1365-2672.1987.tb02679.x>
- 458 Gebru, M., Remans, R., Brouwer, I., Baye, K., Melesse, M. B., Covic, N., ... Vandenberg, M. (2018). Food  
459 Systems for Healthier Diets in Ethiopia. *IFPRI Discussion Paper*, (April). Retrieved from  
460 [https://a4nh.cgiar.org/files/2018/04/DP1050\\_Formatted.pdf](https://a4nh.cgiar.org/files/2018/04/DP1050_Formatted.pdf)
- 461 Grebmer, K. von, Bernstein, J., Patterson, F., Sonntag, A., Maria Klaus, L., Fahlbusch, J., ... Fritschel, H.  
462 (2018). Global Hunger Index: Forced migration and hunger. *International Food Policy Institute*,  
463 68.
- 464 Harrison, J., Moore, K., Paszkiewicz, K., Jones, T., R.Grant, M., Ambacheew, D., ... J.Studholme, D.  
465 (2014). A Draft Genome Sequence for *Ensete ventricosum*, the Drought-Tolerant “Tree Against  
466 Hunger.” *Agronomy*, 4(1), 13–33. <https://doi.org/10.3390/agronomy4010013>
- 467 Heuze, V., Thiollet H., Tran G., Hassoun P., & Lebas F. (2017). *Enset (Ensete ventricosum) corms and*  
468 *pseudostems. Feedipedia, a programme by INRA, CIRAD, AFZ and FAO.*
- 469 Hunduma, T., & Ashenafi, M. (2011). Traditional Enset (*Ensete ventricosum*) Processing Techniques in

- 470 Some Parts of West Shewa Zone, Ethiopia. *Journal of Agriculture and Development*, 2(1), 37–57.
- 471 Retrieved from <http://opendocs.ids.ac.uk/opendocs/handle/123456789/8730>
- 472 Karssa, T. H., Ali, K. A., & Gobena, E. N. (2014). The microbiology of Kocho: An Ethiopian Traditionally  
473 Fermented Food from Enset (*Ensete ventricosum*). *International Journal of Life Sciences*, 8(1), 7–  
474 13. <https://doi.org/10.3126/ijls.v8i1.8716>
- 475 Kato, H., Rhue, M. R., & Nishimura, T. (1989). Role of Free Amino Acids and Peptides in Food Taste. In  
476 *Flavor Chemistry* (Vol. 388, pp. 13–158). American Chemical Society.  
477 <https://doi.org/doi:10.1021/bk-1989-0388.ch013>
- 478 Kebede, A., & Modes, T. (2013). Ethiopia National Food Consumption Survey. *Ethiopian Public Health*  
479 *Institute*, 3, 54–67.
- 480 Mayes, S., Massawe, F. J., Alderson, P. G., Roberts, J. A., Azam-Ali, S. N., & Hermann, M. (2012). The  
481 potential for underutilized crops to improve security of food production. *Journal of Experimental*  
482 *Botany*, 63(3), 1075–1079. <https://doi.org/10.1093/jxb/err396>
- 483 Mohammed, B., Martin, G., & Laila, M. K. (2013). Nutritive values of the drought tolerant food and  
484 fodder crop enset. *African Journal of Agricultural Research*, 8(20), 2326–2333.  
485 <https://doi.org/10.5897/AJAR12.1296>
- 486 Negash, A., & Niehof, A. (2004). The significance of enset culture and biodiversity for rural household  
487 food and livelihood security in southwestern Ethiopia. *Agriculture and Human Values*, 21(1), 61–  
488 71. <https://doi.org/10.1023/B:AHUM.0000014023.30611.ad>
- 489 Nurfeta, A., Tolera, A., Eik, L. O., & Sundstøl, F. (2008). Yield and mineral content of ten enset (*Ensete*  
490 *ventricosum*) varieties. *Tropical Animal Health and Production*, 40(4), 299–309.

- 491 <https://doi.org/10.1007/s11250-007-9095-0>
- 492 Olango, T., Tesfaye, B., Catellani, M., & Pè, M. (2014). Indigenous knowledge, use and on-farm  
493 management of enset (*Ensete ventricosum* (Welw.) Cheesman) diversity in Wolaita, Southern  
494 Ethiopia. *Journal of Ethnobiology and Ethnomedicine*, *10*(1), 41. [https://doi.org/10.1186/1746-](https://doi.org/10.1186/1746-4269-10-41)  
495 [4269-10-41](https://doi.org/10.1186/1746-4269-10-41)
- 496 Pironon, S., Etherington, T. R., Borrell, J. S., Kuhn, N., Macias-Fauria, M., Ondo, I., ... Willis, K. J. (2019).  
497 Potential adaptive strategies for 29 Sub-Saharan crops under future climate change. *Nature*  
498 *Climate Change*, *9*, 758–763.
- 499 R Core Team. (2017). R: A language and environment for statistical computing. R Foundation for  
500 Statistical Computing, Vienna, Austria.
- 501 Tamang, J. P., Watanabe, K., & Holzapfel, W. H. (2016). Review: Diversity of microorganisms in global  
502 fermented foods and beverages. *Frontiers in Microbiology*, *7*(MAR).  
503 <https://doi.org/10.3389/fmicb.2016.00377>
- 504 Tobiaw, D. C., & Bekele, E. (2011). Analysis of genetic diversity among cultivated enset (*Ensete*  
505 *ventricosum*) populations from Essera and Kefficho, southwestern part of Ethiopia using inter  
506 simple sequence repeats (ISSRs) marker. *African Journal of Biotechnology*, *10*(70), 15697–15709.  
507 <https://doi.org/10.5897/AJB11.885>
- 508 Urga, K., Fite, A., & Biratu, E. (1997). Natural fermentation of Enset (*Ensete ventricosum*) for the  
509 production of Kocho. *Ethiopian Journal of Health Development*, *11*(1), 75–81.
- 510 USDA. (2012). Composition of Foods Raw, Processed, Prepared USDA National Nutrient Database for  
511 Standard Reference, Release 25. *USDA National Nutrient Database for Standard Reference*,



- 512        *Release 25*, (September). <https://doi.org/10.13140/RG.2.1.2550.5523>
- 513    Van de Poll, M. C. G., Luiking, Y. C., Dejong, C. H. C., & Soeters, P. (2012). Amino Acids: Specific  
514        Functions. In *Encyclopedia of Human Nutrition* (3rd ed.).
- 515    Welch, R. M., & Graham, R. D. (2004). Breeding for micronutrients in staple food crops from a human  
516        nutrition perspective, *55*(396), 353–364. <https://doi.org/10.1093/jxb/erh064>
- 517    Weldemichael, H., Shimelis, W., Emire, A., & Alemu, M. (2019). Selection and characterisation of the  
518        predominant *Lactobacillus* species as a starter culture in the preparation of kocho , fermented  
519        food from enset. *Food Science and Biotechnology*. <https://doi.org/10.1007/s10068-019-00555-2>
- 520    WHO. (2019). *Nutrition Landscape Information System*. Retrieved from [http://www.ncdrisc.org/data-](http://www.ncdrisc.org/data-downloads.html)  
521        [downloads.html](http://www.ncdrisc.org/data-downloads.html)
- 522    World Food Programme. (2013). *2012 Food Aid Flows*. Retrieved from  
523        <http://documents.wfp.org/stellent/groups/public/documents/newsroom/wfp262299.pdf>
- 524    Yemataw, Z., Mohamed, H., Diro, M., Addis, T., & Blomme, G. (2014). Enset (*Ensete ventricosum*)  
525        clone selection by farmers and their cultural practices in southern Ethiopia. *Genetic Resources*  
526        *and Crop Evolution*, *61*(6), 1091–1104. <https://doi.org/10.1007/s10722-014-0093-6>

527

528

529

530

531

532

533

534

535

536

537

538

539

540

541

542

543

544

545

546

547

548

## 549 Tables

550 **Table 1.** Enset tissue and food product types evaluated in this study.

| Type    | Tissue             | Samples | Uses and food products                                                                                                                                                                                                                       |
|---------|--------------------|---------|----------------------------------------------------------------------------------------------------------------------------------------------------------------------------------------------------------------------------------------------|
| Tissue  | Corm               | 19      | A raw, underground storage organ used to make both kocho and bulla. Also boiled and eaten as 'Amicho'.                                                                                                                                       |
|         | Pseudostem         | 9       | A raw aboveground tissue comprising overlapping leaf sheaths. The pseudostem is the main tissue type making up the bulk of both kocho and bulla. Petioles and leaf midribs are fed to cattle as fodder.                                      |
|         | Leaf               | 1       | Used as a protective layer in baking bread and to line the kocho processing area and fermentation pits                                                                                                                                       |
|         | Fruit flesh        | 1       | Not currently utilized                                                                                                                                                                                                                       |
|         | Fruit peel         | 1       | Not currently utilized                                                                                                                                                                                                                       |
|         | Seed               | 2       | Not currently utilized                                                                                                                                                                                                                       |
| Product | Kocho              | 11      | A traditional fermented flatbread                                                                                                                                                                                                            |
|         | Kocho-Bulla (KoBu) | 8       | A traditional fermented flatbread, but made without extracting the bulla liquid. In this study this practice occurs in Sidama region                                                                                                         |
|         | Bulla              | 8       | The water-insoluble starchy liquid extracted from kocho by squeezing. Bulla can be dried and used as a flour, or made into a gelatinous porridge. It is produced in small amounts and often considered the most valuable enset food product. |

551

552

553

554

555

556

557

558 **Figures**

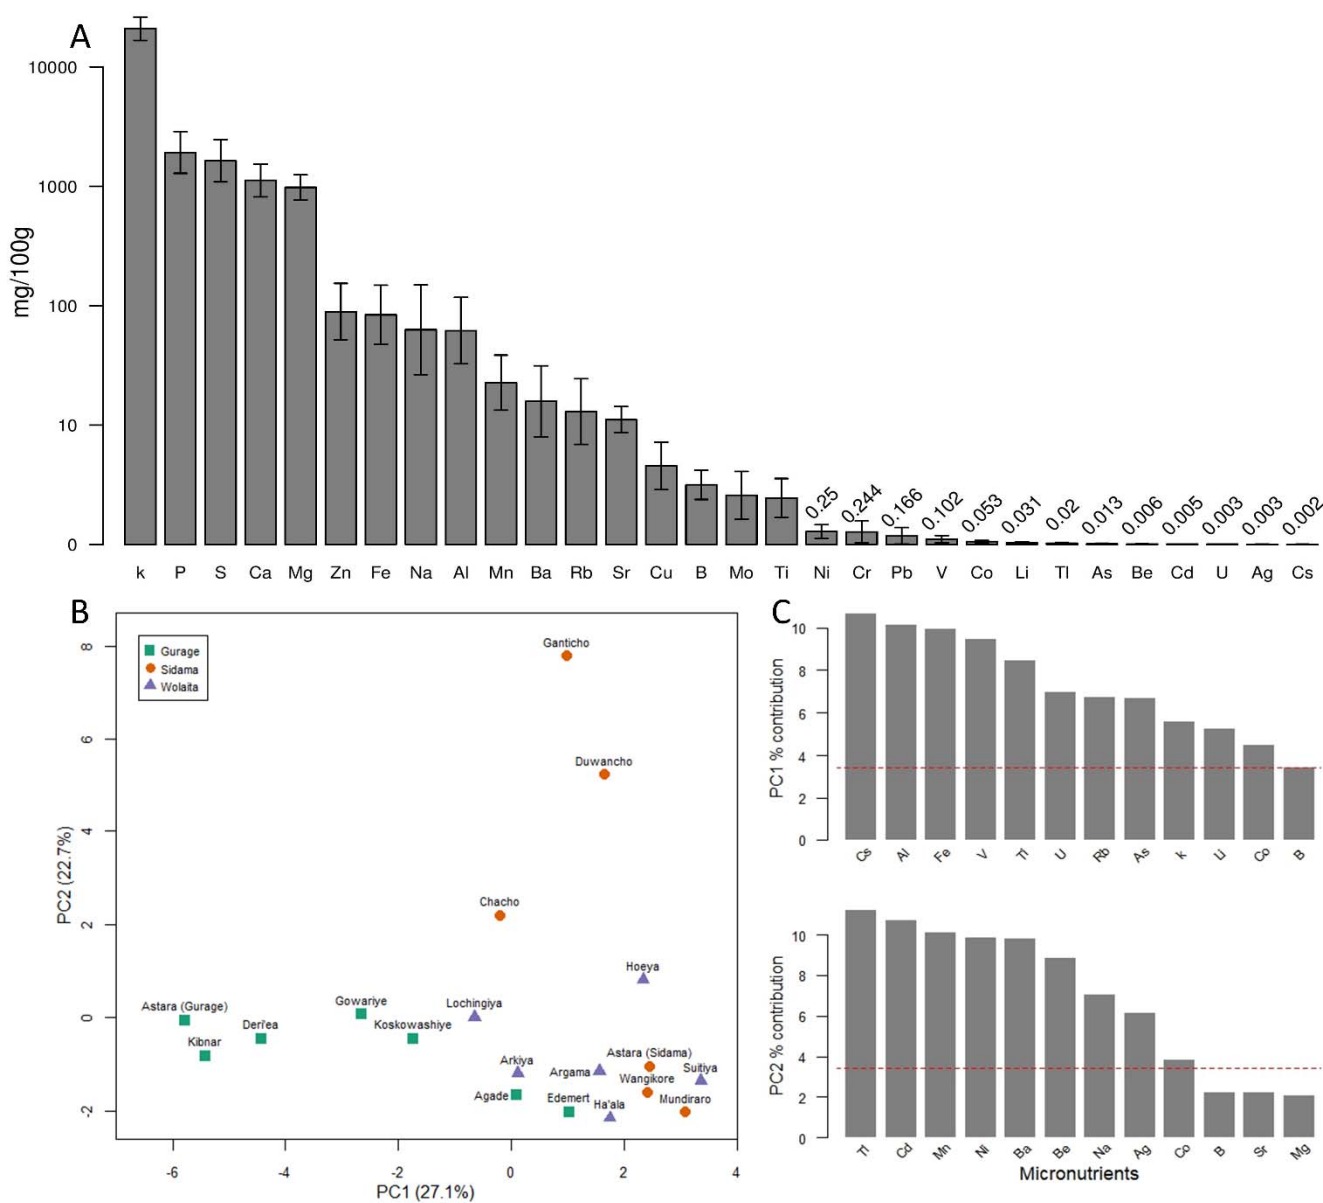

559

560 **Figure 1. Concentration of inorganic minerals in enset corm tissue.** A) Mineral values averaged  
 561 across 19 enset corm samples. Bars denote standard deviation. B) Principal component analysis of  
 562 enset corm inorganic composition across three geographical regions. C) Axis loading plots for the first  
 563 and second principal components. The horizontal red line shows the level at which axis contributions  
 564 would be equal.

565

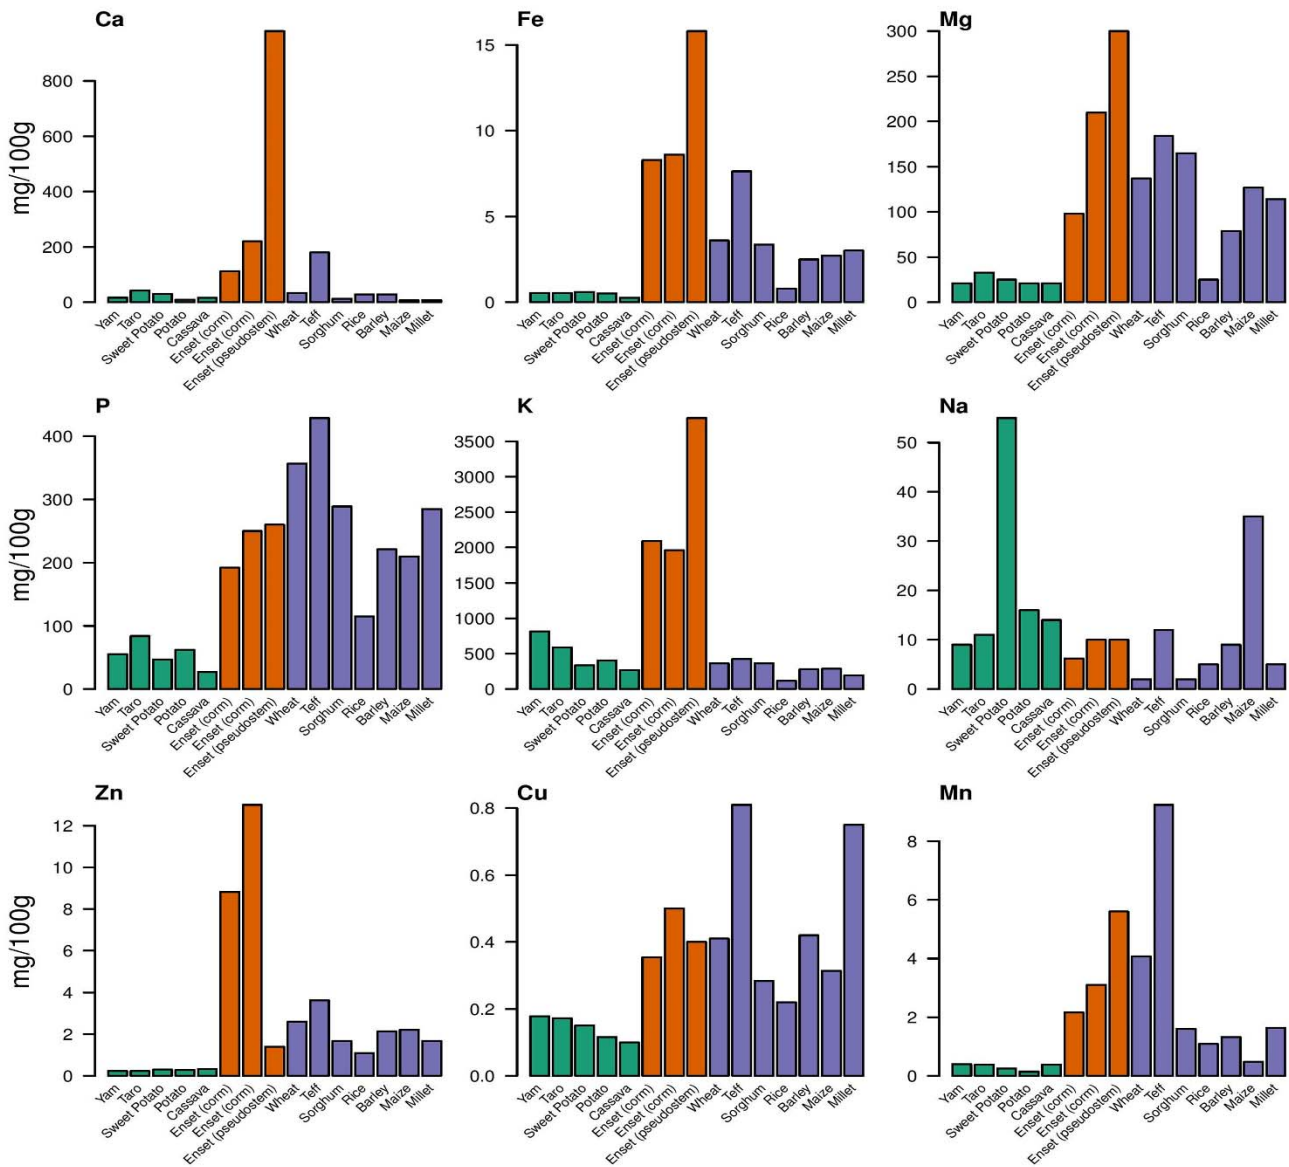

566

567 **Figure 2. Comparison of enset tissue inorganic micronutrients (corn and pseudostem) with**

568 **regionally occurring tubers and cereal crops. For enset three values are provided (from left to right);**

569 **i) Enset (corn) results from this study (note: unavailable for K), ii) Enset (corn) from published**

570 **sources and iii) Enset (pseudostem) from published sources. Comparative values for tuber and cereal**

571 **crops are sourced from Feedipedia and the USDA Food Composition Databases.**

572

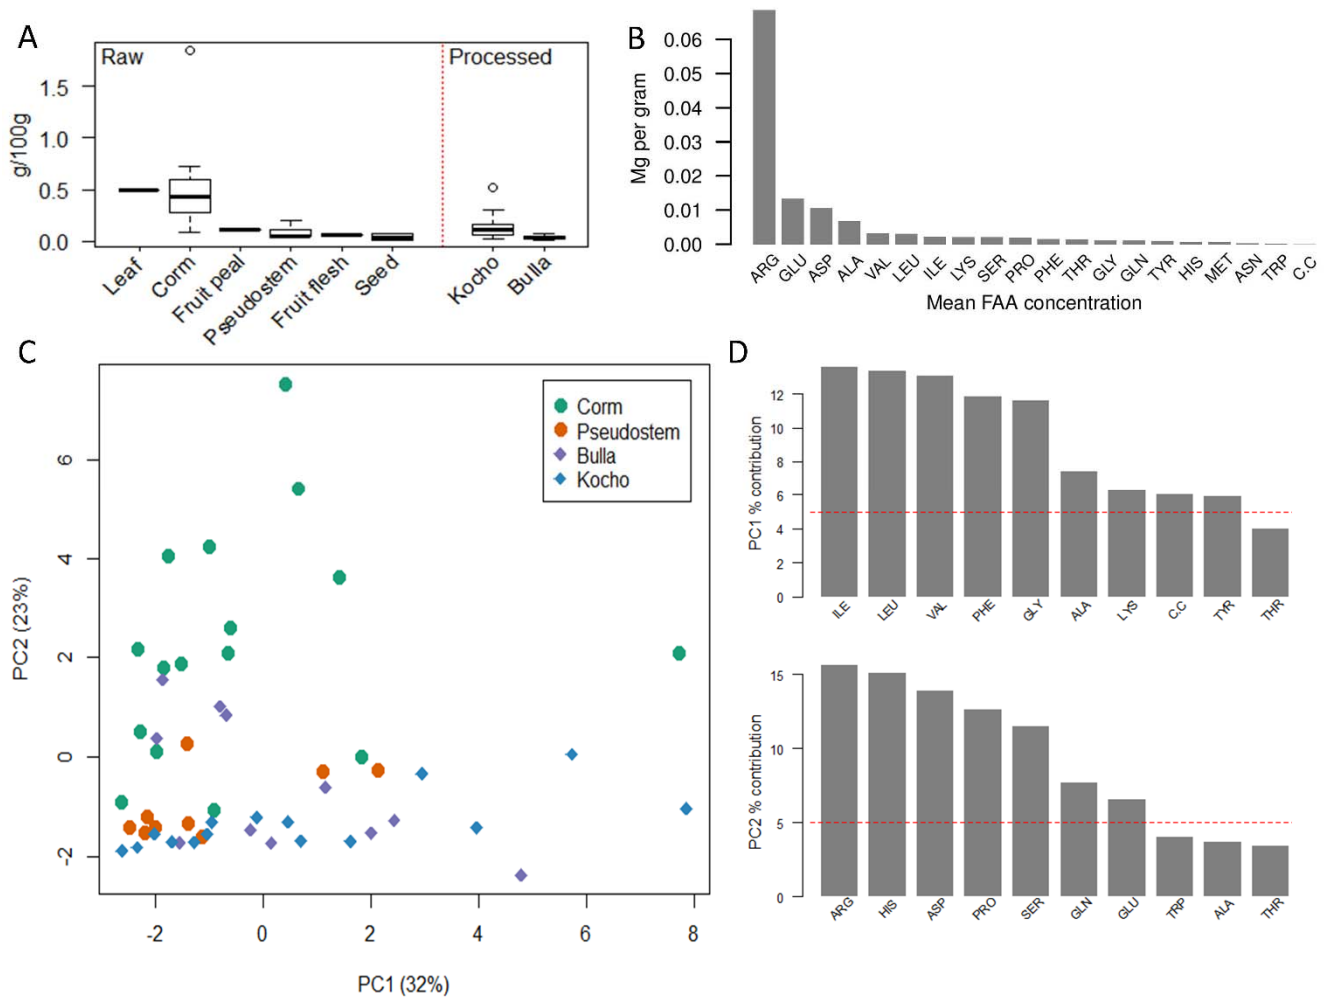

573

574

**Figure 3. Free Amino Acid composition and variation in enset.** A) Quantities of Free Amino Acids

575

(FAAs) present across raw enset tissues and processed enset food products. B) Mean concentrations

576

of free amino acids across all samples. C) Principal component analysis of enset FAAs across four

577

tissue types. D) Axis loading plots for the first and second principal components.

578

579

580

581

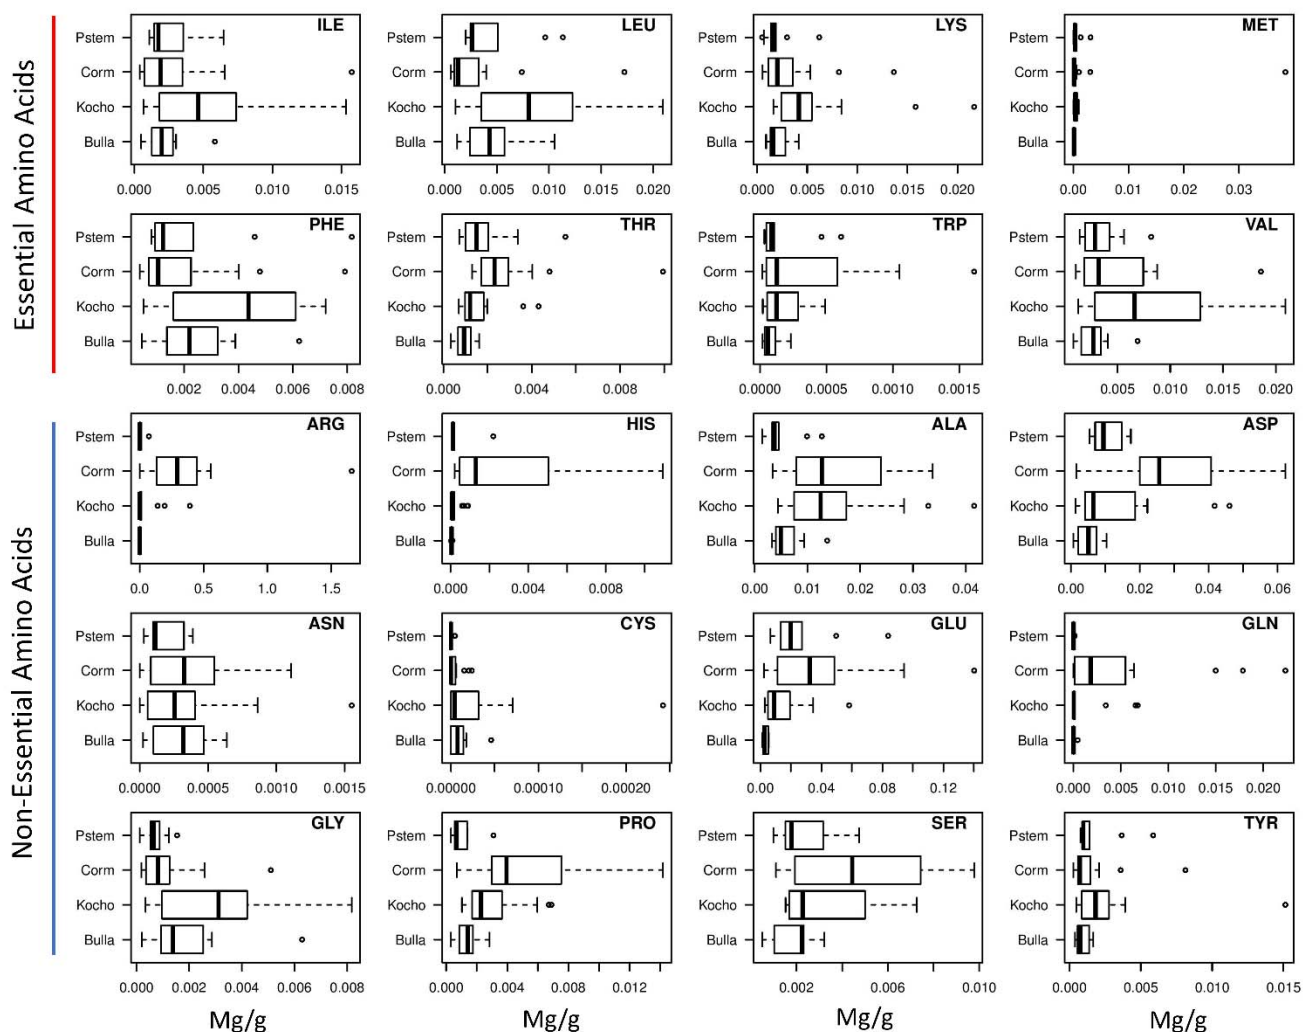

582

583 **Figure 4. Free Amino Acid composition in raw enset tissues (pseudostem and corm) and processed**  
 584 **food products (kocho and bulla). Whilst essential and non-essential amino acids are noted,**  
 585 **conditionally essential amino acids, required in certain circumstances, are presented and include**  
 586 **arginine, histidine, glycine and glutamine.**

587

588

589

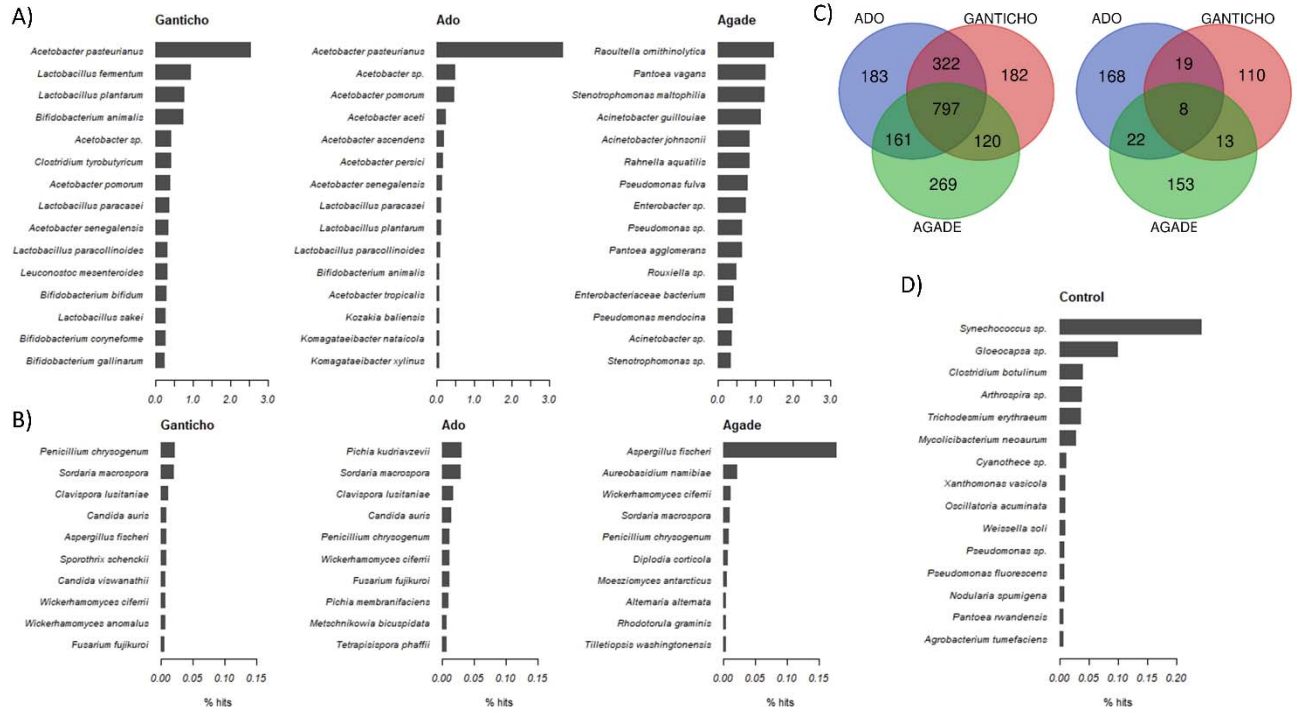

590

591 **Figure 5. Microbial composition of enset kocho samples. Bacteria (A) and Fungi (B) genomes with**  
 592 **highest percentage hit rates across three kocho samples. C) Venn diagrams illustrating the number of**  
 593 **species in common between samples for Bacteria (left) and Fungi (right). D) Top bacteria and fungi**  
 594 **hits from enset leaf tissue**
